# Supplementary material for: Cellulose Triacetate-Based Mixed-Matrix Membranes with MXene 2D Filler—CO2/CH4 Separation Performance and Comparison with TiO2-Based 1D and 0D Fillers
Source: MDPI journal article supplement (doi:10.3390/membranes12100917), 2022-09-22
Supplement: s1 [file s1]

## Supplementary Material

# Cellulose Triacetate-Based Mixed-Matrix Membranes with MXene 2D Filler—CO<sub>2</sub>/CH<sub>4</sub> Separation Performance and Comparison with TiO<sub>2</sub>-Based 1D and 0D Fillers

Chhabilal Regmi <sup>1,2,\*</sup>, Jalal Azadmanjiri <sup>3</sup>, Vipin Mishra <sup>4</sup>, Zdeněk Sofer <sup>3</sup>, Saeed Ashtiani <sup>1</sup> and Karel Friess <sup>1,\*</sup>

<sup>1</sup> Department of Physical Chemistry, University of Chemistry and Technology, Technická 5, 16628 Prague 6 -Dejvicka, Czech Republic

<sup>2</sup> Department of Chemical Engineering, University of Arkansas, Fayetteville, AR 72701, USA

<sup>3</sup> Department of Inorganic Chemistry, University of Chemistry and Technology, Technická 5, 16628 Prague 6 -Dejvicka, Czech Republic

<sup>4</sup> Department of Glass and Ceramics, University of Chemistry and Technology, Technická 5,

16628 Prague 6 -Dejvicka, Czech Republic

## Results and Discussions

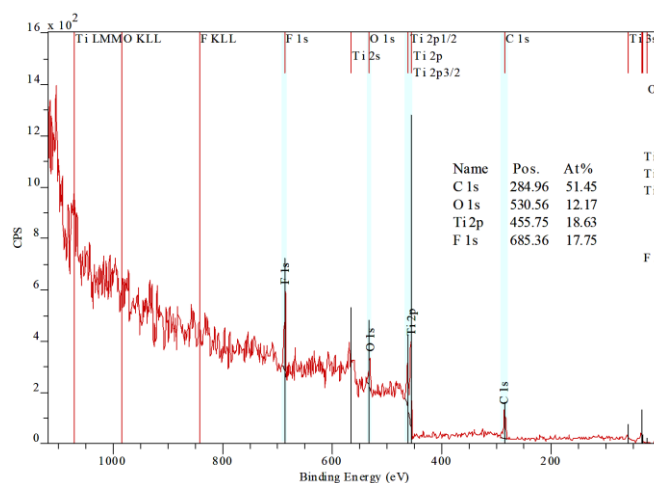

**Figure S1** XPS survey spectrum of MXene nanosheets.

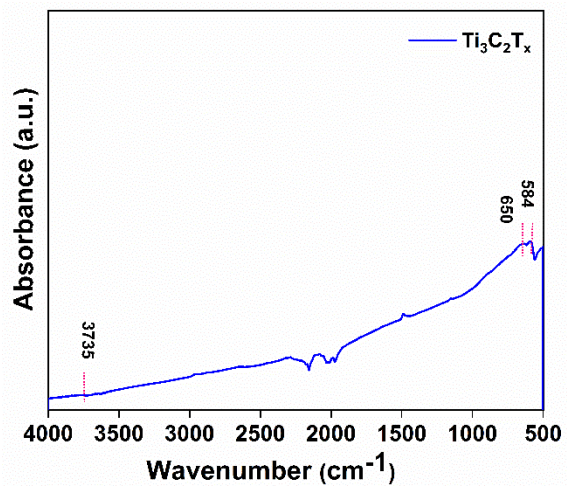

**Figure S2** FTIR spectra of MXene nanosheets.

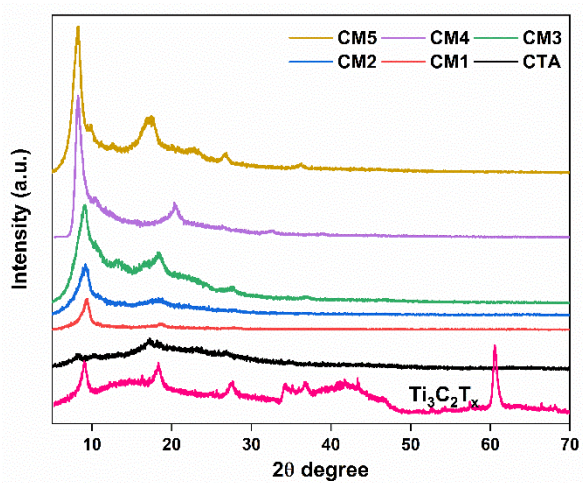

**Figure S3** XRD patterns of synthesized MMMs with different loading concentrations of MXene.

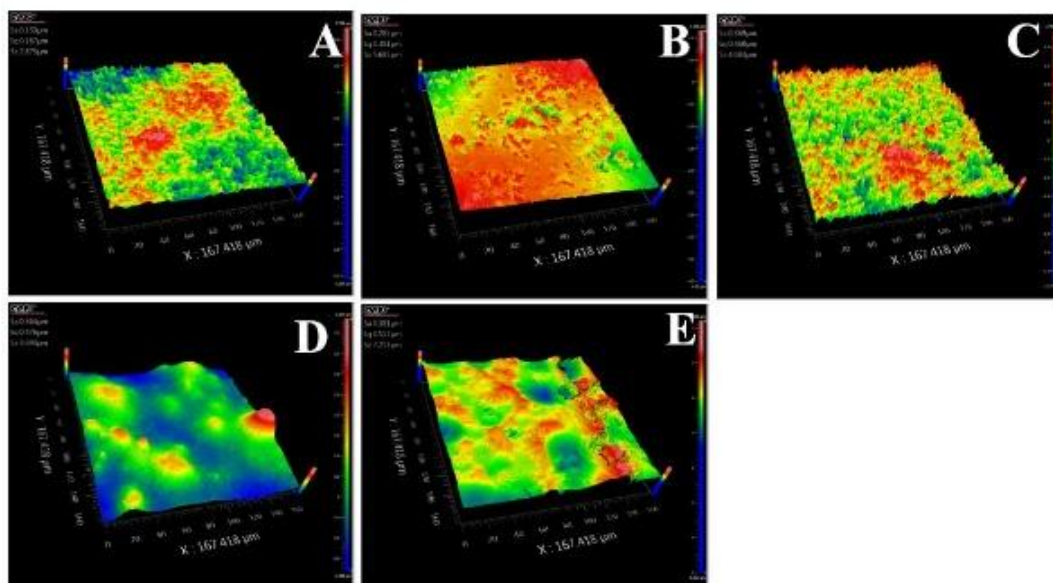

**Figure S4** Surface topography analysis of the prepared MMMs containing different loading concentrations of MXene filler.

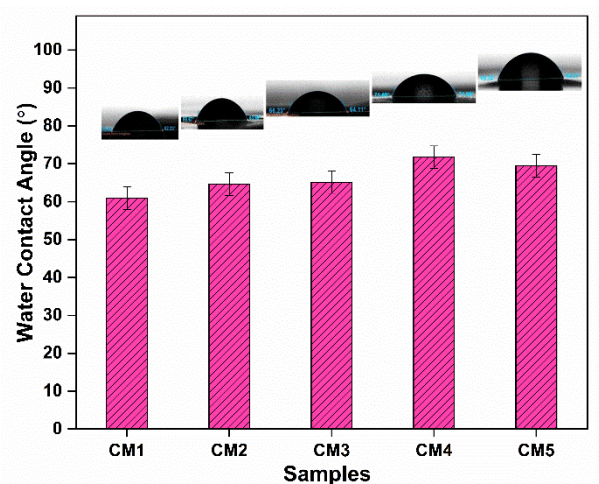

**Figure S5** Water contact angle evaluation of MMMs synthesized with different MXene loading concentrations.

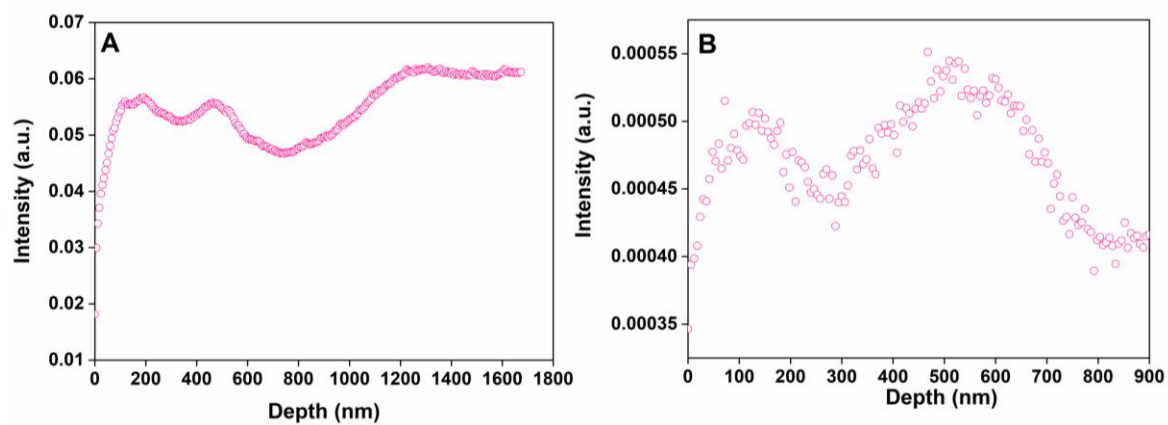

**Figure S6** Depth profile analysis of Ti element distribution in CM3 sample A) surface and B) cross-section.

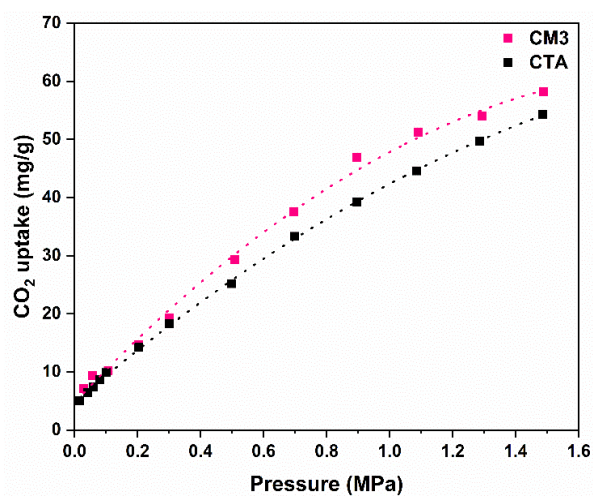

**Figure S7** CO<sub>2</sub> uptake comparison between pristine polymer and MMM with MXene filler.

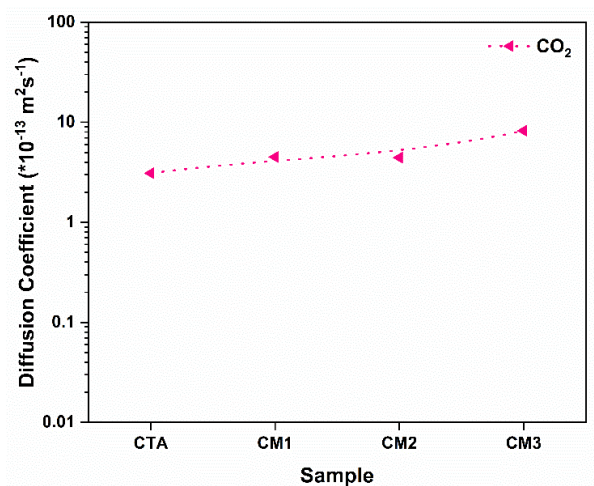

**Figure S8** Diffusion coefficient as a function of MXene fillers concentration.

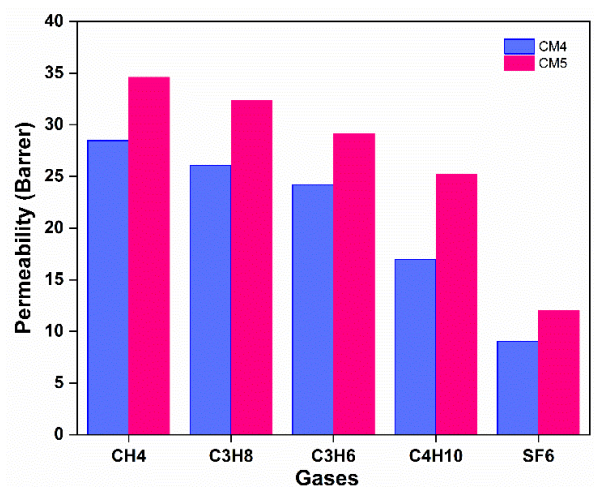

**Figure S9** Permeability comparison of different hydrocarbon and SF6 via CM4 and CM5 membranes.
